# Supplementary material for: Identifying frailty in the Emergency Department—feasibility study
Source: Oxford University Press journal article supplement (doi:10.1093/ageing/afx089), 2017-05-13
Supplement: afx089_aa-16-1065-File002.docx [file afx089_aa-16-1065-File002.docx]

# Appendix 1

Implementation of frailty identification tools in the Emergency Department

Participant number:

Vignette number**:**

*Questions in bold to be asked directly to the participant*

1. From your judgement, is the depicted patient frail or not frail?
2. Scale used:
3. Time to complete assessment:
4. Score obtained:
5. Does this class the patient as frail or not frail?
6. How would you rate the ease of use of this tool? *1-5. 1 being not easy at all, 5 being extremely easy*
7. How would you rate the quality of this tool? *1-5. 1 being very poor, 5 being very good*
8. What do you like about the tool?
9. What do you not like about the tool?
10. Would you use this tool in practice in the future?

**Vignette number:**

1. From your judgement, is the depicted patient frail or not frail?
2. Scale used:
3. Time to complete assessment:
4. Score obtained:
5. Does this class the patient as frail or not frail?
6. How would you rate the ease of use of this tool? *1-5. 1 being not easy at all, 5 being extremely easy*
7. How would you rate the quality of this tool? *1-5. 1 being very poor, 5 being very good*
8. What do you like about the tool?
9. What do you not like about the tool?
10. Would you use this tool in practice in the future?
11. Overall, which of the tools would you be the most likely to use in practice?
12. What do you think about frailty tools in general? *Positives and negatives*.
13. Have you ever used frailty identification tools in practice?
14. What barriers, if any, do you experience that stop you from using these tools regularly?
